# Supplementary material
Source: PubMed Central journal article supplement (PMC6598913)
Supplement: 12250_2017_4002_MOESM1_ESM.pdf [file 12250_2017_4002_MOESM1_ESM.pdf]

## Electronic Supplementary Material

### Drug resistance mutation profiles of the drug-naïve and first-line regimen-treated HIV-1-infected population of Suzhou, China

Tingting Li<sup>1,2#</sup>, Feng Qian<sup>3#</sup>, Ting Yuan<sup>1</sup>, Weilu Xu<sup>3</sup>, Li Zhu<sup>3</sup>, Jinlong Huang<sup>3</sup>, Haiyan Wang<sup>3</sup>, Yueping Zhu<sup>3</sup>, Yinling Wang<sup>3</sup>, Xiaohong Li<sup>3</sup>, Saihong Gu<sup>3</sup>, Zhuqing Tan<sup>3</sup>, Hui Chen<sup>3</sup>, Xiangrong Luo<sup>3</sup>, Wei Zhu<sup>3</sup>, Wenjuan Lu<sup>3</sup>, Ping Xu<sup>3</sup>, Ming Li<sup>3</sup>, Yuying Chen<sup>1,2</sup>, Yong Gao<sup>4</sup>, Rongge Yang<sup>1</sup>, Chuanwu Zhu<sup>3✉</sup>, Binlian Sun<sup>1✉</sup>

1. Research Group of HIV-1 Molecular Epidemiology and Virology, The State Key Laboratory of Virology, Wuhan Institute of Virology, Chinese Academy of Sciences, Wuhan 430071, China
2. University of Chinese Academy of Sciences, Beijing 100000, China
3. Division of HIV-1/AIDS, the Fifth People's Hospital of Suzhou, Suzhou 215000, China
4. Department of Microbiology and Immunology, Schulich School of Medicine & Dentistry, University of Western Ontario, London N6A 5C1, Canada

Supporting information to DOI: 10.1007/s12250-017-4002-y

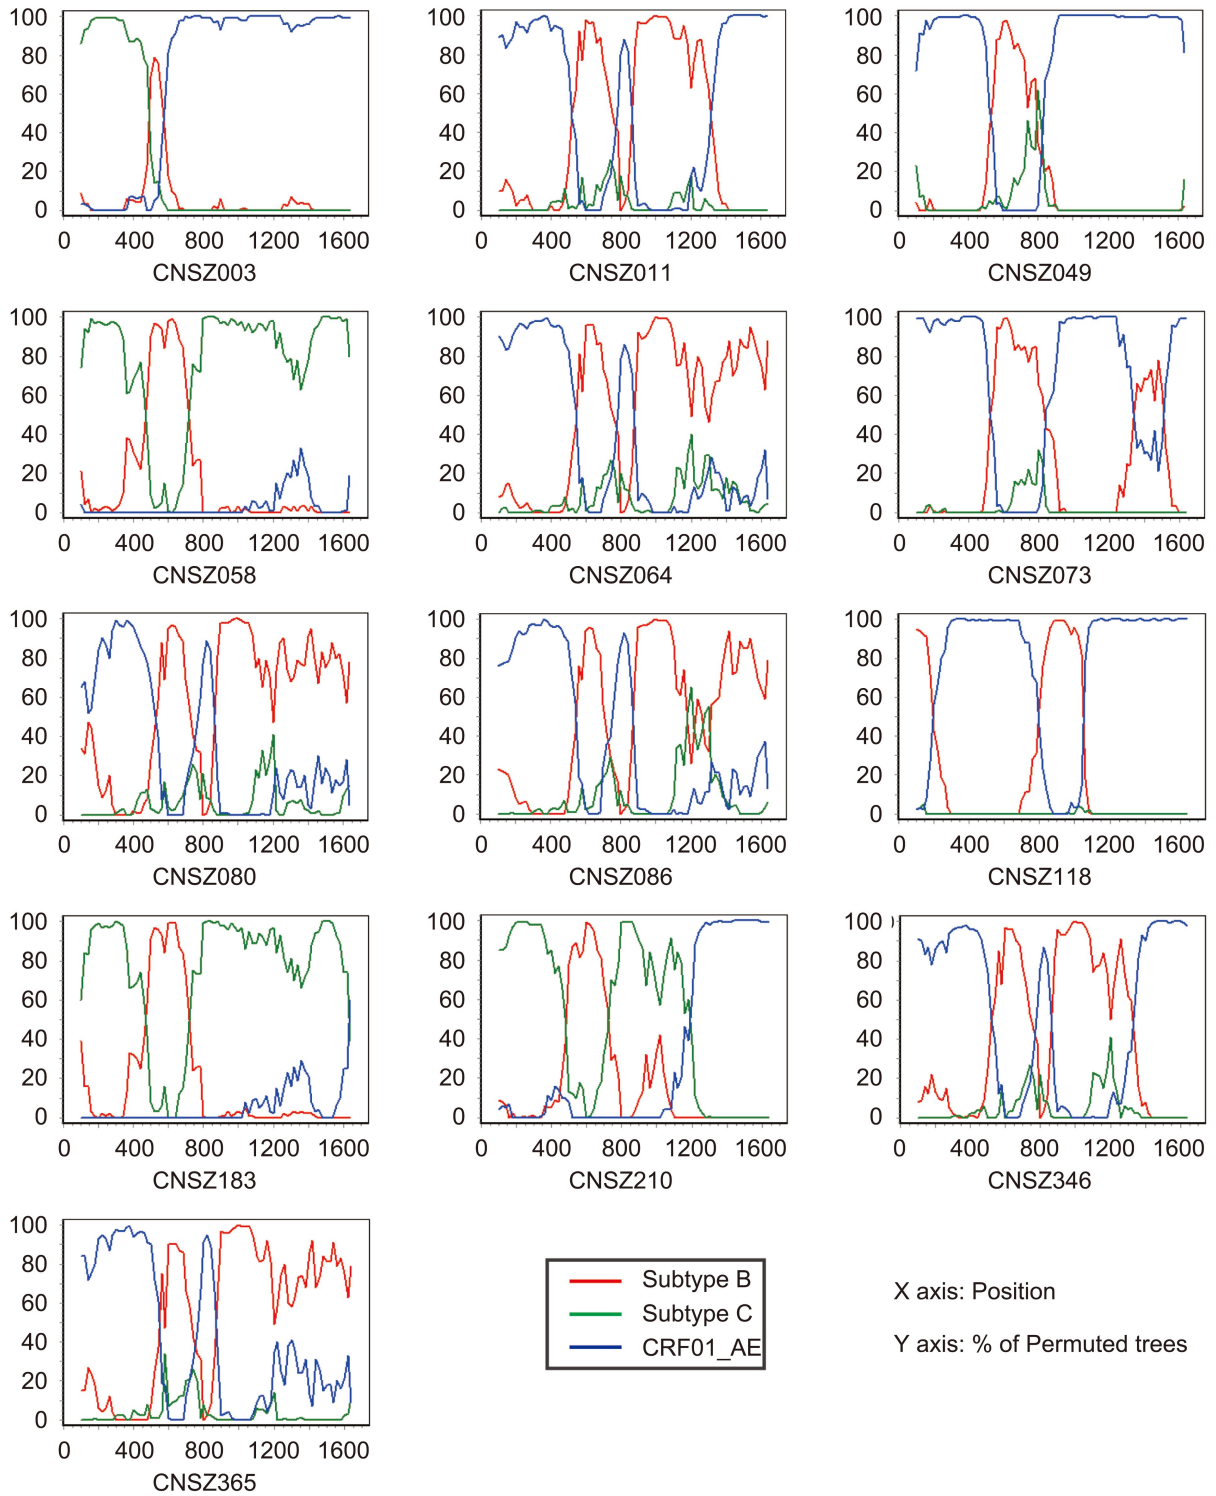

Figure S1. Recombination breakpoint analysis of the 13 URFs. Bootscan plot of percentage permuted trees over nucleotide position across the lengths of RT sequences.
